# Supplementary material for: The inhibitory effect and mechanism of Resina Draconis on the proliferation of MCF-7 breast cancer cells: a network pharmacology-based analysis
Source: PubMed Central journal article supplement (PMC9992681; doi:10.1038/s41598-023-30585-0), 2023-03-07
Supplement: 41598_2023_30585_MOESM1_ESM.pdf [file 41598_2023_30585_MOESM1_ESM.pdf]

# The Inhibitory Effect and Mechanism of Resina Draconis on the Proliferation of MCF-7 Breast Cancer Cells: A Network Pharmacology-Based Analysis

Yana Lv<sup>1,2†</sup> and Yan Mou<sup>3†</sup>, Jing Su<sup>1,2</sup>, Shifang Liu<sup>1,2</sup>, Xuan Ding<sup>1,2</sup>, Yin Yuan<sup>1,2</sup> Ge Li<sup>1,2\*</sup> and Guang Li<sup>1,2\*</sup>

<sup>1</sup> Yunnan Branch of the Institute of Medicinal Plant Development, Chinese Academy of Medical Sciences Jinghong 666100, China

<sup>2</sup> Yunnan Key Laboratory of Southern Medicinal Utilization, Jinghong 666100, China

<sup>3</sup> Yuxi Normal University, Yuxi 653100, China

† These authors contributed equally to this work and share first authorship

\* **Correspondence Author:**

lige19800021@163.com

gli@implad.ac.cn

Supplementary Information includes:

1. Supplementary Figures S1(this file)
2. Supplementary Tables S1-S9, provided as separate files:

Contents of Tables S1-S9:

Table S1: Chemical compounds isolated from RD.

Table S2: 378 relevant targets of bioactive compounds.

Table S3: 984 BC-related genes.

Table S4: 148 RD target genes for the treatment of BC.

Table S5: 227 Biological processes for RD target genes.

Table S6: 142 KEGG pathways for RD target genes.

Table S7: Component-target-pathway network analysis and evaluation.

Table S8: Binding energy of 10 hub targets and their corresponding 103 active compounds.

Table S9: Sequences of primers for RT-qPCR analyses.

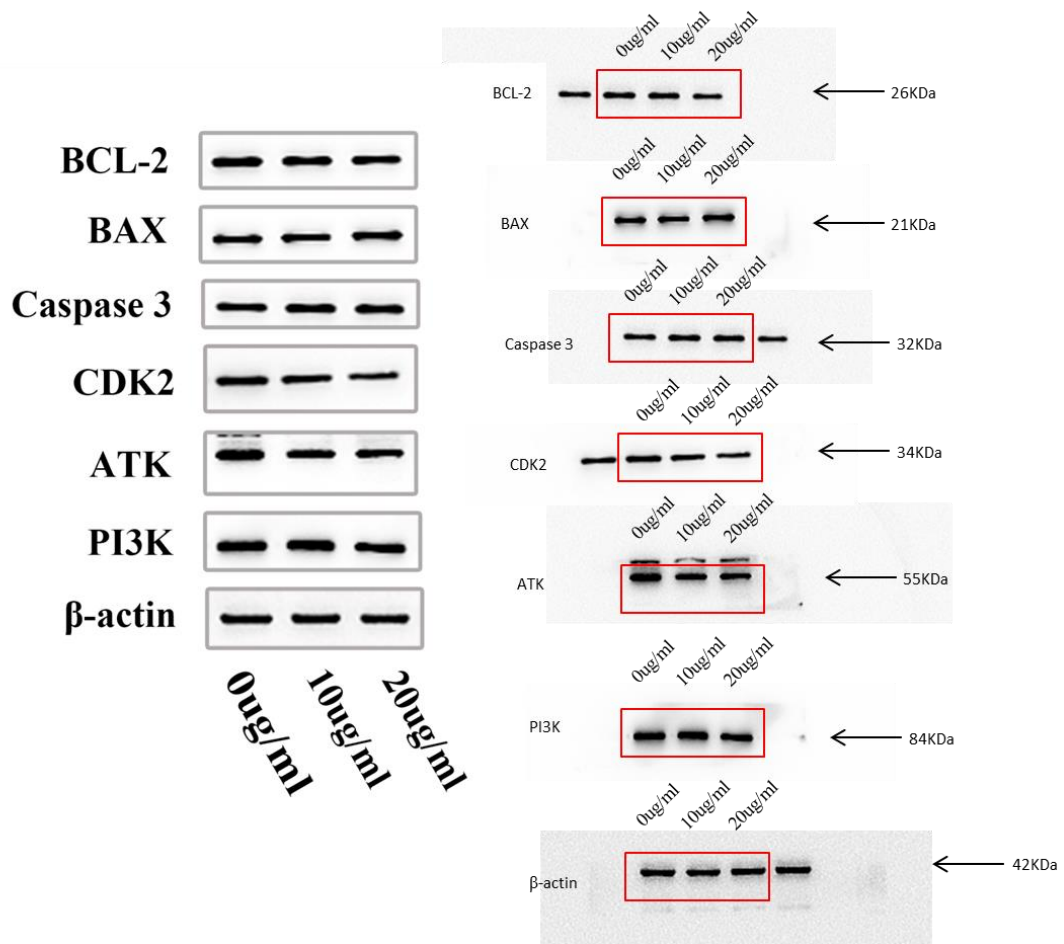

Supplementary FigureS1. Full-length western blots for Figures 13. (Cut the length of NC membrane according to the molecular weight of target protein)
