# Supplementary material for: The inhibitory effect and mechanism of Resina Draconis on the proliferation of MCF-7 breast cancer cells: a network pharmacology-based analysis
Source: Sci Rep. 2023 Mar 7;13:3816. doi: 10.1038/s41598-023-30585-0 (PMC9992681; doi:10.1038/s41598-023-30585-0)
Supplement: Supplementary file 9 — Supplementary Information 9. [file 41598_2023_30585_MOESM9_ESM.xlsx]

## Sheet: Sheet1
receptor	ligand	affinity
AKT1	M149	-10.3
AKT1	M3	-10
AKT1	M5	-10
AKT1	M6	-10
AKT1	M11	-9.9
AKT1	M55	-9.9
AKT1	M117	-9.8
AKT1	M12	-9.8
AKT1	M18	-9.8
AKT1	M43	-9.8
AKT1	M47	-9.8
AKT1	M53	-9.8
AKT1	M147	-9.7
AKT1	M16	-9.7
AKT1	M10	-9.6
AKT1	M45	-9.6
AKT1	M59	-9.6
AKT1	M7	-9.6
AKT1	M8	-9.6
AKT1	M15	-9.5
AKT1	M4	-9.5
AKT1	M54	-9.5
AKT1	M1	-9.4
AKT1	M17	-9.4
AKT1	M2	-9.4
AKT1	M48	-9.4
AKT1	M50	-9.4
AKT1	M61	-9.4
AKT1	M9	-9.4
AKT1	M51	-9.3
AKT1	M65	-9.3
AKT1	M69	-9.3
AKT1	M81	-9.3
AKT1	M60	-9.2
AKT1	M68	-9.2
AKT1	M73	-9.2
AKT1	M74	-9.2
AKT1	M52	-9.1
AKT1	M75	-9.1
AKT1	M42	-9
AKT1	M56	-9
AKT1	M64	-9
AKT1	M67	-9
AKT1	M78	-9
AKT1	M220	-8.9
AKT1	M22	-8.9
AKT1	M145	-8.8
AKT1	M153	-8.8
AKT1	M24	-8.8
AKT1	M57	-8.8
AKT1	M76	-8.8
AKT1	M79	-8.8
AKT1	M83	-8.8
AKT1	M154	-8.7
AKT1	M156	-8.7
AKT1	M58	-8.7
AKT1	M62	-8.7
AKT1	M66	-8.7
AKT1	M80	-8.7
AKT1	M86	-8.7
AKT1	M19	-8.6
AKT1	M23	-8.6
AKT1	M77	-8.6
AKT1	M82	-8.6
AKT1	M150	-8.5
AKT1	M34	-8.5
AKT1	M44	-8.5
AKT1	M63	-8.5
AKT1	M84	-8.5
AKT1	M85	-8.5
AKT1	M218	-8.4
AKT1	M21	-8.4
AKT1	M29	-8.4
AKT1	M35	-8.4
AKT1	M40	-8.4
AKT1	M151	-8.3
AKT1	M20	-8.3
AKT1	M27	-8.3
AKT1	M28	-8.3
AKT1	M31	-8.3
AKT1	M36	-8.3
AKT1	M38	-8.3
AKT1	M41	-8.3
AKT1	M30	-8.2
AKT1	M32	-8.2
AKT1	M39	-8.2
AKT1	M25	-8.1
AKT1	M33	-8.1
AKT1	M49	-8.1
AKT1	M70	-8.1
AKT1	M46	-8
AKT1	M72	-8
AKT1	M160	-7.9
AKT1	M13	-7.9
AKT1	M14	-7.9
AKT1	M71	-7.9
AKT1	M26	-7.8
AKT1	M37	-7.6
AKT1	M155	-7.5
AKT1	M161	-7.3
AKT1	M217	-7.1
AKT1	M122	-7.1
CASP3	M15	-7.5
CASP3	M5	-7.5
CASP3	M7	-7.4
CASP3	M16	-7.3
CASP3	M149	-7.2
CASP3	M4	-7.2
CASP3	M52	-7.2
CASP3	M1	-7.1
CASP3	M122	-7.1
CASP3	M17	-7.1
CASP3	M2	-7.1
CASP3	M43	-7.1
CASP3	M9	-7.1
EGFR	M34	-9.1
EGFR	M67	-9.1
EGFR	M7	-9.1
EGFR	M45	-9
EGFR	M55	-9
EGFR	M59	-9
EGFR	M61	-9
EGFR	M5	-8.9
EGFR	M50	-8.9
EGFR	M51	-8.9
EGFR	M6	-8.9
EGFR	M60	-8.9
EGFR	M80	-8.9
EGFR	M81	-8.9
EGFR	M10	-8.8
EGFR	M17	-8.8
EGFR	M68	-8.8
EGFR	M8	-8.8
EGFR	M9	-8.8
EGFR	M1	-8.7
EGFR	M3	-8.7
EGFR	M65	-8.7
EGFR	M11	-8.6
EGFR	M12	-8.6
EGFR	M145	-8.6
EGFR	M2	-8.6
EGFR	M4	-8.6
EGFR	M43	-8.6
EGFR	M48	-8.6
EGFR	M53	-8.6
EGFR	M56	-8.6
EGFR	M58	-8.6
EGFR	M86	-8.6
EGFR	M18	-8.5
EGFR	M15	-8.4
EGFR	M22	-8.4
EGFR	M31	-8.4
EGFR	M35	-8.4
EGFR	M52	-8.4
EGFR	M73	-8.4
EGFR	M83	-8.4
EGFR	M117	-8.3
EGFR	M149	-8.3
EGFR	M16	-8.3
EGFR	M78	-8.3
EGFR	M54	-8.2
EGFR	M62	-8.2
EGFR	M66	-8.2
EGFR	M69	-8.2
EGFR	M82	-8.2
EGFR	M19	-8.1
EGFR	M36	-8.1
EGFR	M47	-8.1
EGFR	M57	-8.1
EGFR	M63	-8.1
EGFR	M74	-8.1
EGFR	M85	-8.1
EGFR	M147	-8
EGFR	M23	-8
EGFR	M24	-8
EGFR	M64	-8
EGFR	M75	-8
EGFR	M154	-7.7
EGFR	M156	-7.7
EGFR	M70	-7.7
EGFR	M13	-7.6
EGFR	M20	-7.6
EGFR	M29	-7.6
EGFR	M38	-7.6
EGFR	M40	-7.6
EGFR	M76	-7.6
EGFR	M151	-7.5
EGFR	M21	-7.5
EGFR	M77	-7.5
EGFR	M79	-7.5
EGFR	M84	-7.5
EGFR	M153	-7.4
EGFR	M26	-7.4
EGFR	M32	-7.4
EGFR	M33	-7.4
EGFR	M37	-7.4
EGFR	M41	-7.4
EGFR	M49	-7.4
EGFR	M71	-7.4
EGFR	M72	-7.4
EGFR	M14	-7.3
EGFR	M39	-7.3
EGFR	M44	-7.3
EGFR	M46	-7.3
EGFR	M220	-7.2
EGFR	M27	-7.2
EGFR	M218	-7.1
EGFR	M28	-7.1
ESR1	M48	-9.2
ESR1	M80	-9.2
ESR1	M2	-9.1
ESR1	M6	-9.1
ESR1	M4	-9
ESR1	M55	-9
ESR1	M67	-9
ESR1	M73	-9
ESR1	M1	-8.9
ESR1	M15	-8.9
ESR1	M62	-8.9
ESR1	M10	-8.8
ESR1	M11	-8.8
ESR1	M16	-8.8
ESR1	M7	-8.8
ESR1	M9	-8.8
ESR1	M43	-8.7
ESR1	M45	-8.7
ESR1	M75	-8.7
ESR1	M13	-8.6
ESR1	M18	-8.6
ESR1	M3	-8.5
ESR1	M56	-8.5
ESR1	M58	-8.5
ESR1	M68	-8.5
ESR1	M8	-8.5
ESR1	M22	-8.4
ESR1	M32	-8.4
ESR1	M5	-8.4
ESR1	M53	-8.4
ESR1	M54	-8.4
ESR1	M79	-8.4
ESR1	M14	-8.3
ESR1	M21	-8.3
ESR1	M52	-8.3
ESR1	M59	-8.3
ESR1	M17	-8.2
ESR1	M20	-8.1
ESR1	M29	-8.1
ESR1	M31	-8.1
ESR1	M40	-8.1
ESR1	M41	-8.1
ESR1	M83	-8.1
ESR1	M34	-8
ESR1	M51	-8
ESR1	M57	-8
ESR1	M78	-8
ESR1	M24	-7.9
ESR1	M35	-7.9
ESR1	M38	-7.9
ESR1	M219	-7.8
ESR1	M12	-7.8
ESR1	M19	-7.8
ESR1	M47	-7.8
ESR1	M66	-7.8
ESR1	M81	-7.8
ESR1	M151	-7.7
ESR1	M25	-7.7
ESR1	M74	-7.7
ESR1	M218	-7.6
ESR1	M220	-7.6
ESR1	M117	-7.6
ESR1	M61	-7.6
ESR1	M161	-7.5
ESR1	M149	-7.5
ESR1	M27	-7.5
ESR1	M50	-7.5
ESR1	M77	-7.5
ESR1	M82	-7.5
ESR1	M145	-7.4
ESR1	M86	-7.4
ESR1	M122	-7.3
ESR1	M147	-7.3
ESR1	M36	-7.3
ESR1	M60	-7.3
ESR1	M72	-7.3
ESR1	M156	-7.2
ESR1	M30	-7.2
ESR1	M84	-7.2
ESR1	M23	-7.1
HSP90AA1	M73	-8.2
HSP90AA1	M10	-8
HSP90AA1	M7	-8
HSP90AA1	M74	-8
HSP90AA1	M78	-8
HSP90AA1	M1	-7.9
HSP90AA1	M11	-7.9
HSP90AA1	M17	-7.9
HSP90AA1	M18	-7.9
HSP90AA1	M2	-7.9
HSP90AA1	M4	-7.9
HSP90AA1	M5	-7.9
HSP90AA1	M8	-7.9
HSP90AA1	M12	-7.8
HSP90AA1	M15	-7.8
HSP90AA1	M16	-7.8
HSP90AA1	M50	-7.8
HSP90AA1	M6	-7.8
HSP90AA1	M81	-7.8
HSP90AA1	M9	-7.8
HSP90AA1	M52	-7.7
HSP90AA1	M57	-7.7
HSP90AA1	M75	-7.7
HSP90AA1	M51	-7.6
HSP90AA1	M80	-7.6
HSP90AA1	M13	-7.5
HSP90AA1	M3	-7.5
HSP90AA1	M46	-7.5
HSP90AA1	M54	-7.5
HSP90AA1	M55	-7.5
HSP90AA1	M61	-7.5
HSP90AA1	M68	-7.5
HSP90AA1	M14	-7.4
HSP90AA1	M149	-7.4
HSP90AA1	M156	-7.4
HSP90AA1	M43	-7.4
HSP90AA1	M45	-7.4
HSP90AA1	M53	-7.4
HSP90AA1	M65	-7.4
HSP90AA1	M79	-7.4
HSP90AA1	M24	-7.3
HSP90AA1	M30	-7.3
HSP90AA1	M34	-7.3
HSP90AA1	M41	-7.3
HSP90AA1	M47	-7.3
HSP90AA1	M49	-7.3
HSP90AA1	M58	-7.3
HSP90AA1	M67	-7.3
HSP90AA1	M145	-7.2
HSP90AA1	M154	-7.2
HSP90AA1	M32	-7.2
HSP90AA1	M48	-7.2
HSP90AA1	M59	-7.2
HSP90AA1	M64	-7.2
HSP90AA1	M66	-7.2
HSP90AA1	M71	-7.2
HSP90AA1	M76	-7.2
HSP90AA1	M77	-7.2
HSP90AA1	M86	-7.2
HSP90AA1	M122	-7.1
HSP90AA1	M23	-7.1
HSP90AA1	M60	-7.1
IGF1	M2	-9.9
IGF1	M15	-9.8
IGF1	M1	-9.7
IGF1	M10	-9.4
IGF1	M18	-9.1
IGF1	M4	-9
IGF1	M7	-9
IGF1	M16	-8.9
IGF1	M3	-8.9
IGF1	M48	-8.8
IGF1	M6	-8.8
IGF1	M8	-8.8
IGF1	M12	-8.7
IGF1	M11	-8.6
IGF1	M17	-8.6
IGF1	M45	-8.6
IGF1	M5	-8.6
IGF1	M73	-8.6
IGF1	M22	-8.5
IGF1	M9	-8.5
IGF1	M19	-8.4
IGF1	M34	-8.4
IGF1	M61	-8.4
IGF1	M81	-8.4
IGF1	M13	-8.3
IGF1	M147	-8.3
IGF1	M27	-8.3
IGF1	M36	-8.3
IGF1	M69	-8.3
IGF1	M47	-8.2
IGF1	M51	-8.2
IGF1	M53	-8.2
IGF1	M68	-8.2
IGF1	M74	-8.2
IGF1	M149	-8.1
IGF1	M24	-8.1
IGF1	M39	-8.1
IGF1	M43	-8.1
IGF1	M52	-8.1
IGF1	M54	-8.1
IGF1	M67	-8.1
IGF1	M75	-8.1
IGF1	M59	-8
IGF1	M65	-8
IGF1	M79	-8
IGF1	M153	-7.9
IGF1	M26	-7.9
IGF1	M40	-7.9
IGF1	M55	-7.9
IGF1	M64	-7.9
IGF1	M85	-7.9
IGF1	M86	-7.9
IGF1	M220	-7.8
IGF1	M145	-7.8
IGF1	M154	-7.8
IGF1	M156	-7.8
IGF1	M78	-7.8
IGF1	M80	-7.8
IGF1	M150	-7.7
IGF1	M33	-7.7
IGF1	M35	-7.7
IGF1	M50	-7.7
IGF1	M58	-7.7
IGF1	M60	-7.7
IGF1	M63	-7.7
IGF1	M66	-7.7
IGF1	M83	-7.7
IGF1	M32	-7.6
IGF1	M41	-7.6
IGF1	M70	-7.6
IGF1	M77	-7.6
IGF1	M31	-7.5
IGF1	M38	-7.5
IGF1	M44	-7.5
IGF1	M62	-7.5
IGF1	M76	-7.5
IGF1	M82	-7.5
IGF1	M37	-7.4
IGF1	M49	-7.4
IGF1	M56	-7.4
IGF1	M57	-7.4
IGF1	M218	-7.3
IGF1	M21	-7.3
IGF1	M23	-7.3
IGF1	M42	-7.3
IGF1	M46	-7.3
IGF1	M84	-7.3
IGF1	M25	-7.2
IGF1	M117	-7.1
IGF1	M28	-7.1
IGF1	M30	-7.1
MAPK1	M8	-8.7
MAPK1	M11	-8.6
MAPK1	M55	-8.6
MAPK1	M10	-8.5
MAPK1	M3	-8.5
MAPK1	M4	-8.5
MAPK1	M6	-8.5
MAPK1	M7	-8.5
MAPK1	M12	-8.4
MAPK1	M18	-8.4
MAPK1	M47	-8.4
MAPK1	M5	-8.4
MAPK1	M50	-8.4
MAPK1	M16	-8.3
MAPK1	M14	-8.2
MAPK1	M147	-8.2
MAPK1	M2	-8.2
MAPK1	M45	-8.2
MAPK1	M48	-8.2
MAPK1	M71	-8.2
MAPK1	M117	-8.1
MAPK1	M13	-8.1
MAPK1	M17	-8.1
MAPK1	M51	-8.1
MAPK1	M61	-8.1
MAPK1	M68	-8.1
MAPK1	M1	-8
MAPK1	M149	-8
MAPK1	M53	-8
MAPK1	M59	-8
MAPK1	M69	-8
MAPK1	M75	-8
MAPK1	M78	-8
MAPK1	M9	-8
MAPK1	M15	-7.9
MAPK1	M154	-7.9
MAPK1	M156	-7.9
MAPK1	M43	-7.9
MAPK1	M52	-7.9
MAPK1	M54	-7.9
MAPK1	M63	-7.9
MAPK1	M73	-7.9
MAPK1	M56	-7.8
MAPK1	M60	-7.8
MAPK1	M65	-7.8
MAPK1	M72	-7.8
MAPK1	M81	-7.8
MAPK1	M153	-7.7
MAPK1	M62	-7.7
MAPK1	M64	-7.7
MAPK1	M67	-7.7
MAPK1	M70	-7.7
MAPK1	M80	-7.7
MAPK1	M218	-7.6
MAPK1	M74	-7.6
MAPK1	M86	-7.6
MAPK1	M220	-7.5
MAPK1	M21	-7.5
MAPK1	M22	-7.5
MAPK1	M44	-7.5
MAPK1	M46	-7.5
MAPK1	M58	-7.5
MAPK1	M66	-7.5
MAPK1	M77	-7.5
MAPK1	M79	-7.5
MAPK1	M82	-7.5
MAPK1	M19	-7.4
MAPK1	M38	-7.4
MAPK1	M49	-7.4
MAPK1	M57	-7.4
MAPK1	M76	-7.4
MAPK1	M85	-7.4
MAPK1	M150	-7.3
MAPK1	M20	-7.3
MAPK1	M23	-7.3
MAPK1	M24	-7.3
MAPK1	M39	-7.3
MAPK1	M83	-7.3
MAPK1	M145	-7.2
MAPK1	M26	-7.2
MAPK1	M28	-7.2
MAPK1	M30	-7.2
MAPK1	M37	-7.2
MAPK1	M155	-7.1
MAPK1	M25	-7.1
MAPK1	M31	-7.1
MAPK1	M84	-7.1
MDM2	M122	-8.1
MDM2	M117	-7.5
MDM2	M61	-7.4
MDM2	M68	-7.3
MDM2	M62	-7.2
MDM2	M67	-7.2
MDM2	M69	-7.2
MDM2	M15	-7.1
MDM2	M56	-7.1
MDM2	M57	-7.1
MDM2	M59	-7.1
MDM2	M80	-7.1
RHOA	M122	-10
RHOA	M73	-9.1
RHOA	M80	-9
RHOA	M12	-8.9
RHOA	M10	-8.8
RHOA	M68	-8.8
RHOA	M72	-8.7
RHOA	M75	-8.7
RHOA	M1	-8.6
RHOA	M29	-8.6
RHOA	M4	-8.6
RHOA	M59	-8.6
RHOA	M60	-8.6
RHOA	M149	-8.5
RHOA	M15	-8.5
RHOA	M2	-8.5
RHOA	M32	-8.5
RHOA	M6	-8.5
RHOA	M55	-8.4
RHOA	M43	-8.3
RHOA	M52	-8.3
RHOA	M16	-8.2
RHOA	M18	-8.2
RHOA	M3	-8.2
RHOA	M31	-8.2
RHOA	M45	-8.2
RHOA	M5	-8.2
RHOA	M50	-8.2
RHOA	M53	-8.2
RHOA	M56	-8.2
RHOA	M8	-8.2
RHOA	M17	-8.1
RHOA	M30	-8.1
RHOA	M51	-8.1
RHOA	M67	-8.1
RHOA	M7	-8.1
RHOA	M9	-8.1
RHOA	M11	-8
RHOA	M41	-8
RHOA	M69	-8
RHOA	M74	-8
RHOA	M117	-7.9
RHOA	M38	-7.9
RHOA	M58	-7.9
RHOA	M66	-7.9
RHOA	M70	-7.9
RHOA	M220	-7.8
RHOA	M147	-7.8
RHOA	M19	-7.8
RHOA	M24	-7.8
RHOA	M48	-7.8
RHOA	M64	-7.8
RHOA	M77	-7.8
RHOA	M81	-7.8
RHOA	M13	-7.7
RHOA	M23	-7.7
RHOA	M44	-7.7
RHOA	M46	-7.7
RHOA	M54	-7.7
RHOA	M61	-7.7
RHOA	M14	-7.6
RHOA	M156	-7.6
RHOA	M22	-7.6
RHOA	M34	-7.6
RHOA	M47	-7.6
RHOA	M71	-7.6
RHOA	M76	-7.6
RHOA	M150	-7.5
RHOA	M20	-7.5
RHOA	M25	-7.5
RHOA	M35	-7.5
RHOA	M37	-7.5
RHOA	M62	-7.5
RHOA	M78	-7.5
RHOA	M79	-7.5
RHOA	M85	-7.5
RHOA	M145	-7.4
RHOA	M154	-7.4
RHOA	M49	-7.4
RHOA	M63	-7.4
RHOA	M65	-7.4
RHOA	M153	-7.3
RHOA	M57	-7.3
RHOA	M86	-7.3
RHOA	M27	-7.2
RHOA	M28	-7.2
RHOA	M36	-7.2
RHOA	M33	-7.1
RHOA	M82	-7.1
RHOA	M83	-7.1
SRC	M45	-9.2
SRC	M48	-9.2
SRC	M3	-9.1
SRC	M6	-9.1
SRC	M5	-9
SRC	M17	-8.8
SRC	M43	-8.8
SRC	M50	-8.8
SRC	M7	-8.8
SRC	M12	-8.7
SRC	M67	-8.7
SRC	M8	-8.7
SRC	M9	-8.7
SRC	M1	-8.6
SRC	M18	-8.6
SRC	M2	-8.6
SRC	M47	-8.6
SRC	M52	-8.6
SRC	M68	-8.6
SRC	M15	-8.5
SRC	M53	-8.5
SRC	M56	-8.5
SRC	M57	-8.5
SRC	M74	-8.5
SRC	M11	-8.4
SRC	M4	-8.4
SRC	M54	-8.4
SRC	M66	-8.4
SRC	M69	-8.4
SRC	M73	-8.4
SRC	M10	-8.3
SRC	M117	-8.3
SRC	M16	-8.3
SRC	M55	-8.3
SRC	M63	-8.3
SRC	M64	-8.3
SRC	M51	-8.2
SRC	M60	-8.2
SRC	M78	-8.2
SRC	M145	-8.1
SRC	M75	-8.1
SRC	M81	-8.1
SRC	M86	-8.1
SRC	M149	-8
SRC	M59	-8
SRC	M19	-7.9
SRC	M22	-7.9
SRC	M24	-7.9
SRC	M34	-7.9
SRC	M38	-7.9
SRC	M36	-7.8
SRC	M80	-7.8
SRC	M82	-7.8
SRC	M84	-7.8
SRC	M85	-7.8
SRC	M14	-7.7
SRC	M20	-7.7
SRC	M31	-7.7
SRC	M32	-7.7
SRC	M44	-7.7
SRC	M46	-7.7
SRC	M62	-7.7
SRC	M76	-7.7
SRC	M83	-7.7
SRC	M23	-7.6
SRC	M29	-7.6
SRC	M37	-7.6
SRC	M77	-7.6
SRC	M161	-7.5
SRC	M220	-7.5
SRC	M122	-7.5
SRC	M147	-7.5
SRC	M153	-7.5
SRC	M154	-7.5
SRC	M155	-7.5
SRC	M156	-7.5
SRC	M30	-7.5
SRC	M61	-7.5
SRC	M70	-7.5
SRC	M79	-7.5
SRC	M13	-7.4
SRC	M21	-7.4
SRC	M28	-7.4
SRC	M33	-7.4
SRC	M65	-7.4
SRC	M72	-7.4
SRC	M26	-7.3
SRC	M40	-7.3
SRC	M41	-7.3
SRC	M49	-7.3
SRC	M58	-7.3
SRC	M71	-7.3
SRC	M218	-7.2
SRC	M35	-7.2
SRC	M39	-7.2
SRC	M160	-7.1
SRC	M27	-7.1
SRC	M42	-7.1
